# Supplementary material for: Clonal analysis reveals laminar fate multipotency and daughter cell apoptosis of mouse cortical intermediate progenitors
Source: Oxford University Press journal article supplement (doi:10.1242/dev.164335), 2018-09-01
Supplement: dev164335supp.pdf [file dev164335supp.pdf]

**Figure S1**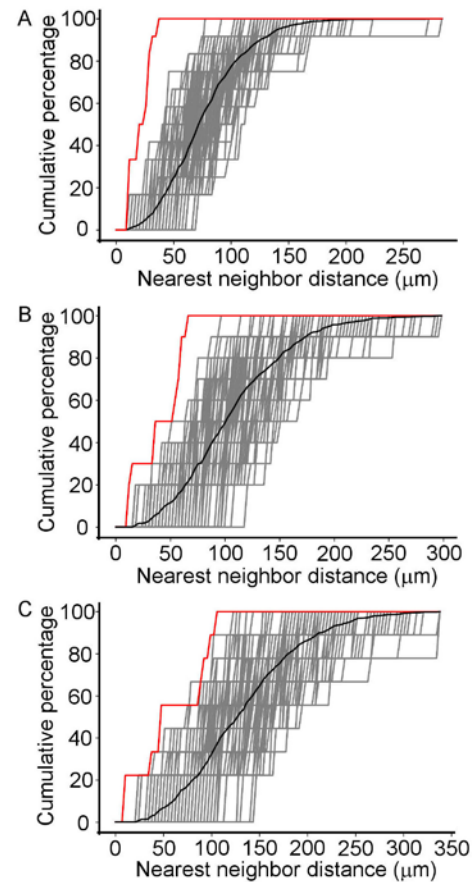

**Figure S1. Nearest neighbor distance (NND) analysis of multilayer clones.** (A-C) Plots represent the cumulative percentage distribution of NNDs of three individual multilayer clones (red) and corresponding random simulated data sets (gray for each set, black for the mean of all sets). The data indicate that labeled neurons were not randomly distributed, but formed clusters consistent with clonal origins. (A) An E11.5 IP clone;  $p = 2.4 \times 10^{-9}$ . (B) An E11.5 IP clone (shown in Fig. 1C-C");  $p = 2.1 \times 10^{-6}$ . (C) An E13.5 IP clone;  $p = 4.6 \times 10^{-4}$ .
